# Supplementary material
Source: PubMed Central journal article supplement (PMC3397394)
Supplement: NIHMS377834-supplement-1.pdf [file NIHMS377834-supplement-1.pdf]

Supplementary Figures.pdf Contains supplementary figures 1-12 that further support and enrich some of the claims and statements made in the text.

Supplementary Tables.pdf Contains supplementary tables 1-13 that further support and enrich some of the claims and statements made in the text.

Supplementary Methods.pdf Detailed description of all methods and algorithms used in the paper.

Supplementary Materials.pdf Descriptions of additional analyses performed in this study that due to space limitations could not be included in the main text.
