# Supplementary material
Source: PubMed Central journal article supplement (PMC3397394)
Supplement: NIHMS377834-supplement-5.pdf [file NIHMS377834-supplement-5.pdf]

| Cells<br>(pg DNA) | Effective<br>coverage<br>per allele | Usable<br>wells | % bases<br>read | Shared<br>wells |
|-------------------|-------------------------------------|-----------------|-----------------|-----------------|
| 10 (66)           | 3x                                  | 9.5             | 95              | 7.7             |
| 15 (99)           | 2x                                  | 14              | 86              | 9.3             |
| 20 (132)*         | 1.5x                                | 18              | 78              | 9.9             |
| 30 (198)**        | 1x                                  | 26              | 63              | 9.3             |
| 40 (264)          | 0.75x                               | 32              | 53              | 8.1             |
| 60 (396)          | 0.5x                                | 44              | 39              | 6.0             |

**Supplementary Table 1. Optimal number of cells for a predefined number of reads.** Usable wells are calculated by taking into account wells having more than one fragment with the same haplotype or mix of both haplotypes. % bases read in each molecule is calculated using binomial distribution on effective coverage; Shared wells = (usable wells) x (%bases read)<sup>2</sup> X 0.9. 0.9 is the fraction of two loci separated by 10kb that are within the same 100kb fragment. \*Optimal number of cells to use if starting from whole cells. \*\*Due to the stochastic separation of chromosomal fragments after DNA isolation 10 more cells worth of DNA are preferred when starting from isolated DNA. All values are given in double stranded DNA, but for current LFR all DNA is denatured to single stranded prior to aliquoting. For this reason half the listed optimal amount of DNA or cells were used in LFR. All of the above calculations are based on an 80x genome coverage, 60x effective genome coverage library.

| Item                                    | Cost          |
|-----------------------------------------|---------------|
| MDA                                     | 14.50         |
| CoRE fragmenting                        | 35.40         |
| Barcode Adapter Ligation                | 32.40         |
| Bead purification after pooling         | 6.90          |
| Plates, pipette tips, plate seals, etc. | 18.80         |
| <b>Total</b>                            | <b>108.00</b> |

**Supplementary Table 2. LFR reagent cost.**

Cost per each step was based upon manufacturer list prices. All prices are in US dollars. A complete breakdown of reagents used in LFR can be found in the Supplementary Methods.

| Library                                                           | NA19240 10 Cell | NA19240 Replicate 1 | NA19240 Replicate 2 | NA19240 Pipeline 2.0 | NA19240 High Coverage | NA12877 Replicate 1 | NA12877 Replicate 2 | NA12885    | NA12886    | NA12891    | NA12892    | NA20431 High Coverage | NA19240 STD | NA12877 STD | NA12878 STD | NA12885 STD | NA12886 STD | NA12891 STD | NA12892 STD | NA20431 STD |      |
|-------------------------------------------------------------------|-----------------|---------------------|---------------------|----------------------|-----------------------|---------------------|---------------------|------------|------------|------------|------------|-----------------------|-------------|-------------|-------------|-------------|-------------|-------------|-------------|-------------|------|
| dbSNP build                                                       | 130             | 130                 | 130                 | 130                  | 132                   | 130                 | 130                 | 130        | 130        | 130        | 130        | 132                   | 130         | 130         | 130         | 130         | 130         | 130         | 130         | 130         | 130  |
| NCBI genome build                                                 | 36.3            | 36.3                | 36.3                | 36.3                 | 37.2                  | 36.3                | 36.3                | 36.3       | 36.3       | 36.3       | 36.3       | 37.2                  | 36.3        | 36.3        | 36.3        | 36.3        | 36.3        | 36.3        | 36.3        | 36.3        | 36.3 |
| Gender                                                            | FEMALE          | FEMALE              | FEMALE              | FEMALE               | FEMALE                | MALE                | MALE                | FEMALE     | MALE       | MALE       | FEMALE     | MALE                  | FEMALE      | MALE        | FEMALE      | FEMALE      | MALE        | MALE        | MALE        | FEMALE      | MALE |
| Gross mapping yield (Gb)                                          | 307.64          | 237.42              | 312.74              | 237.45               | 509                   | 258.1               | 238.39              | 272.39     | 293.37     | 279.83     | 284.52     | 513.63                | 176.45      | 217.89      | 216.32      | 220.86      | 216         | 245.92      | 213.3       | 192.28      |      |
| 100k normalized coverage variability                              | 0.2059          | 0.1573              | 0.1742              | 0.161                | 0.159                 | 0.1305              | 0.1477              | 0.1567     | 0.1507     | 0.1553     | 0.1149     | 0.2158                | 0.0153      | 0.0123      | 0.0119      | 0.015       | 0.0137      | 0.0183      | 0.0131      | N/A         |      |
| Mate distribution mean                                            | 326             | 263                 | 302                 | 263                  | 262                   | 241                 | 250                 | 261        | 262        | 298        | 266        | 235                   | 301         | 333         | 331         | 311         | 307         | 295         | 339         | N/A         |      |
| Mate distribution range (95% "CI")                                | (160, 617)      | (105, 580)          | (145, 598)          | (105, 580)           | (105, 579)            | (110, 530)          | (108, 536)          | (106, 569) | (113, 558) | (123, 615) | (108, 575) | (94, 530)             | (185, 477)  | (223, 492)  | (219, 488)  | (210, 460)  | (211, 447)  | (175, 444)  | (224, 478)  | N/A         |      |
| SNP Transitions/transversions                                     | 2.12            | 2.10                | 2.13                | 2.09                 | 2.15                  | 2.13                | 2.13                | 2.11       | 2.13       | 2.09       | 2.12       | 2.14                  | 2.14        | 2.13        | 2.15        | 2.14        | 2.15        | 2.13        | 2.13        | 2.14        |      |
| SNP het/hom ratio                                                 | 1.60            | 1.67                | 1.68                | 1.931                | 1.95                  | 1.41                | 1.46                | 1.44       | 1.49       | 1.43       | 1.55       | 1.49                  | 1.94        | 1.56        | 1.53        | 1.56        | 1.60        | 1.55        | 1.56        | 1.56        |      |
| INS het/hom ratio                                                 | 1.71            | 1.47                | 2.50                | 1.79                 | 1.95                  | 1.36                | 1.40                | 1.47       | 1.57       | 1.58       | 1.49       | 1.84                  | 1.58        | 1.38        | 1.28        | 1.35        | 1.39        | 1.36        | 1.38        | 1.35        |      |
| DEL het/hom ratio                                                 | 1.99            | 2.20                | 2.18                | 2.435                | 2.40                  | 1.65                | 1.78                | 1.69       | 1.75       | 1.78       | 1.80       | 1.83                  | 2.31        | 1.68        | 1.64        | 1.66        | 1.73        | 1.61        | 1.64        | 1.66        |      |
| SUB het/hom ratio                                                 | 2.07            | 2.40                | 2.24                | 2.797                | 2.71                  | 1.78                | 1.96                | 2.08       | 2.05       | 2.48       | 2.04       | 2.28                  | 2.21        | 1.76        | 1.69        | 1.78        | 1.82        | 1.71        | 1.69        | 1.75        |      |
| SNP total count                                                   | 3,515,822       | 3,391,102           | 3,636,702           | 3,720,905            | 3,751,078             | 2,891,061           | 2,876,795           | 3,016,298  | 3,104,007  | 3,003,110  | 3,130,825  | 3,041,456             | 4,053,968   | 3,347,317   | 3,237,673   | 3,341,870   | 3,301,954   | 3,370,841   | 3,335,390   | 3,261,375   |      |
| Het SNPs                                                          | 2,162,154       | 2,120,945           | 2,281,748           | 2,269,965            | 2,410,575             | 1,693,868           | 1,705,994           | 1,790,295  | 1,859,283  | 1,767,838  | 1,900,711  | 1,721,862             | 2,676,177   | 2,039,517   | 1,960,235   | 2,034,951   | 2,029,760   | 2,049,456   | 2,032,007   | 1,988,716   |      |
| INS total count                                                   | 209,174         | 155,395             | 238,528             | 188,553              | 207,387               | 135,578             | 128,991             | 151,898    | 161,797    | 158,847    | 160,985    | 185,009               | 212,648     | 193,143     | 166,295     | 183,735     | 177,321     | 205,447     | 199,403     | 194,899     |      |
| DEL total count                                                   | 206,102         | 168,752             | 199,706             | 202,476              | 212,367               | 142,522             | 137,948             | 157,602    | 165,511    | 161,930    | 170,391    | 181,820               | 236,038     | 211,211     | 182,699     | 201,660     | 194,632     | 224,235     | 217,276     | 203,206     |      |
| SUB total count                                                   | 73,061          | 67,405              | 75,372              | 77,832               | 79,035                | 55,438              | 55,811              | 63,515     | 66,387     | 69,891     | 65,769     | 67,642                | 83,374      | 73,442      | 66,170      | 71,740      | 70,641      | 75,698      | 72,121      | 67,942      |      |
| SNP novel rate                                                    | 0.043           | 0.051               | 0.050               | 0.085                | 0.030                 | 0.069               | 0.071               | 0.057      | 0.053      | 0.055      | 0.034      | 0.139                 | 0.045       | 0.067       | 0.018       | 0.044       | 0.043       | 0.024       | 0.024       | 0.066       |      |
| INS novel rate                                                    | 0.349           | 0.303               | 0.457               | 0.359                | 0.338                 | 0.238               | 0.231               | 0.263      | 0.275      | 0.306      | 0.243      | 0.713                 | 0.291       | 0.215       | 0.190       | 0.207       | 0.204       | 0.214       | 0.208       | 0.218       |      |
| DEL novel rate                                                    | 0.326           | 0.352               | 0.337               | 0.382                | 0.334                 | 0.250               | 0.251               | 0.257      | 0.254      | 0.296      | 0.252      | 0.262                 | 0.340       | 0.240       | 0.226       | 0.234       | 0.233       | 0.235       | 0.233       | 0.236       |      |
| SUB novel rate                                                    | 0.434           | 0.452               | 0.448               | 0.507                | 0.397                 | 0.346               | 0.355               | 0.389      | 0.383      | 0.456      | 0.364      | 0.408                 | 0.413       | 0.351       | 0.302       | 0.335       | 0.333       | 0.335       | 0.319       | 0.339       |      |
| Fully called genome fraction                                      | 0.905           | 0.885               | 0.913               | 0.899                | 0.936                 | 0.910               | 0.898               | 0.910      | 0.931      | 0.913      | 0.923      | 0.938                 | 0.961       | 0.967       | 0.952       | 0.962       | 0.961       | 0.974       | 0.965       | 0.958       |      |
| Partially called genome fraction                                  | 0.016           | 0.022               | 0.015               | 0.001                | 0.000                 | 0.017               | 0.020               | 0.016      | 0.013      | 0.016      | 0.013      | 0.000                 | 0.007       | 0.005       | 0.010       | 0.007       | 0.007       | 0.003       | 0.006       | 0.007       |      |
| No-called genome fraction                                         | 0.078           | 0.093               | 0.072               | 0.1                  | 0.064                 | 0.073               | 0.082               | 0.074      | 0.056      | 0.071      | 0.064      | 0.062                 | 0.032       | 0.028       | 0.038       | 0.031       | 0.032       | 0.023       | 0.029       | 0.035       |      |
| Fully called genome fraction, Coding                              | 0.796           | 0.752               | 0.845               | 0.78                 | 0.870                 | 0.807               | 0.796               | 0.808      | 0.870      | 0.824      | 0.818      | 0.884                 | 0.943       | 0.965       | 0.950       | 0.957       | 0.960       | 0.920       | 0.949       | 0.928       |      |
| Partially called genome fraction, Coding                          | 0.024           | 0.030               | 0.018               | 0.001                | 0.000                 | 0.024               | 0.025               | 0.024      | 0.013      | 0.023      | 0.023      | 0.000                 | 0.010       | 0.007       | 0.008       | 0.007       | 0.006       | 0.018       | 0.006       | 0.014       |      |
| No-called genome fraction, Coding                                 | 0.181           | 0.218               | 0.137               | 0.22                 | 0.130                 | 0.170               | 0.179               | 0.168      | 0.056      | 0.153      | 0.160      | 0.115                 | 0.048       | 0.037       | 0.042       | 0.036       | 0.033       | 0.062       | 0.045       | 0.058       |      |
| Synonymous SNP loci                                               | 8,266           | 7,502               | 9,312               | 9,360                | 11,147                | 6,526               | 6,496               | 6,866      | 7,745      | 6,899      | 7,041      | 9,106                 | 11,713      | 9,386       | 9,201       | 9,475       | 9,528       | 9,572       | 9,199       | 8,707       |      |
| Missense SNP loci                                                 | 8,173           | 7,726               | 9,137               | 10,875               | 11,106                | 6,769               | 6,837               | 7,449      | 8,107      | 7,557      | 7,309      | 9,315                 | 11,032      | 9,383       | 8,982       | 9,368       | 9,467       | 9,274       | 8,926       | 8,502       |      |
| Nonsense SNP loci                                                 | 102             | 112                 | 122                 | 218                  | 144                   | 78                  | 84                  | 107        | 107        | 113        | 96         | 143                   | 125         | 96          | 84          | 92          | 104         | 95          | 87          | 96          |      |
| Nonstop SNP loci                                                  | 21              | 20                  | 26                  | 27                   | 19                    | 16                  | 20                  | 18         | 22         | 19         | 21         | 13                    | 24          | 21          | 22          | 24          | 24          | 24          | 29          | 23          |      |
| Frame-shifting INS loci                                           | 229             | 140                 | 542                 | 265                  | 346                   | 145                 | 135                 | 204        | 220        | 244        | 175        | 349                   | 148         | 131         | 119         | 122         | 145         | 138         | 122         | 121         |      |
| Frame-shifting DEL loci                                           | 105             | 151                 | 134                 | 287                  | 250                   | 107                 | 130                 | 156        | 126        | 203        | 136        | 275                   | 160         | 119         | 120         | 125         | 117         | 129         | 122         | 105         |      |
| Frame-shifting SUB loci                                           | 26              | 44                  | 21                  | 43                   | 40                    | 17                  | 26                  | 47         | 38         | 52         | 30         | 45                    | 26          | 23          | 25          | 29          | 26          | 31          | 21          | 26          |      |
| Frame-preserving INS loci                                         | 86              | 72                  | 95                  | 140                  | 164                   | 79                  | 81                  | 76         | 93         | 71         | 78         | 157                   | 108         | 121         | 113         | 122         | 106         | 137         | 109         | 106         |      |
| Frame-preserving DEL loci                                         | 94              | 77                  | 108                 | 136                  | 144                   | 90                  | 84                  | 98         | 82         | 85         | 85         | 129                   | 144         | 127         | 118         | 135         | 138         | 128         | 121         | 105         |      |
| Frame-preserving SUB loci                                         | 214             | 211                 | 274                 | 378                  | 365                   | 165                 | 183                 | 282        | 246        | 277        | 258        | 360                   | 275         | 257         | 307         | 286         | 294         | 279         | 288         | 229         |      |
| Frame-shifting/preserving ratio                                   | 0.91            | 0.93                | 1.46                | 0.91                 | 0.95                  | 0.81                | 0.84                | 0.92       | 0.88       | 1.16       | 0.81       | 1.04                  | 0.63        | 0.54        | 0.49        | 0.51        | 0.54        | 0.55        | 0.51        | 0.57        |      |
| Nonsyn/syn SNP ratio                                              | 0.99            | 1.03                | 0.98                | 1.19                 | 1.01                  | 1.04                | 1.05                | 1.08       | 1.05       | 1.10       | 1.04       | 1.04                  | 0.94        | 1.00        | 0.98        | 0.99        | 0.99        | 0.97        | 0.97        | 0.98        |      |
| Insertion/deletions ratio                                         | 1.01            | 0.92                | 1.19                | 0.93                 | 0.98                  | 0.95                | 0.94                | 0.96       | 0.98       | 0.98       | 0.94       | 1.02                  | 0.90        | 0.91        | 0.91        | 0.91        | 0.91        | 0.92        | 0.92        | 0.96        |      |
| Ins+del/SNP ratio                                                 | 0.12            | 0.10                | 0.12                | 0.11                 | 0.11                  | 0.10                | 0.09                | 0.10       | 0.11       | 0.11       | 0.11       | 0.12                  | 0.11        | 0.12        | 0.11        | 0.12        | 0.11        | 0.13        | 0.12        | 0.12        |      |
| Coding insertion/deletions ratio                                  | 1.55            | 0.92                | 2.60                | 0.96                 | 1.31                  | 1.13                | 1.00                | 1.16       | 1.38       | 1.09       | 1.12       | 1.27                  | 0.82        | 1.01        | 0.95        | 0.93        | 0.97        | 1.05        | 0.93        | 0.90        |      |
| Coding SNP/all SNP ratio                                          | 0.0053          | 0.0051              | 0.0057              | 0.0061               | 0.0063                | 0.0053              | 0.0054              | 0.0055     | 0.0059     | 0.0056     | 0.0053     | 0.0065                | 0.0063      | 0.0065      | 0.0065      | 0.0065      | 0.0066      | 0.0065      | 0.0063      | 0.0060      |      |
| Coding (ins+del)/all (ins+del) ratio                              | 0.0012          | 0.0013              | 0.0020              | 0.0021               | 0.0021                | 0.0015              | 0.0016              | 0.0017     | 0.0016     | 0.0019     | 0.0014     | 0.0024                | 0.0012      | 0.0012      | 0.0013      | 0.0013      | 0.0013      | 0.0012      | 0.0011      | 0.0008      |      |
| Pct with mates on different contigs or more than 50kb apart       | 6.68%           | 2.42%               | 5.94%               | 2.42%                | 2.42%                 | 2.96%               | 1.87%               | 1.84%      | 1.87%      | 1.99%      | 2.52%      | 2.05%                 | 1.91%       | 1.36%       | 1.74%       | 1.66%       | 1.52%       | 1.02%       | 1.09%       | 1.96%       |      |
| Pct with mates within 50kb on different strands (order undefined) | 3.73%           | 2.40%               | 4.50%               | 2.40%                | 2.40%                 | 2.09%               | 2.09%               | 2.14%      | 2.37%      | 2.46%      | 2.02%      | 2.22%                 | 0.00%       | 0.00%       | 0.00%       | 0.00%       | 0.00%       | 0.01%       | 0.00%       | 0.00%       |      |

**Supplementary Table 3. Library statistics.** The table lists Complete Genomics' summary output metrics for each genome sequence analyzed in this study. In general, LFR libraries produced lower quality genome metrics. All libraries with STD in the title are genomes processed using the Complete Genomics standard sequencing pipeline and are part of a public release of genome data<sup>28</sup>.

| (a)                                                | (b)       | (c)               | (d)                  | e             | (f)                          | (g)                         | (h)                          | (i)                               | (j)                                       | (k)                                       | (l)                             | (m)                        | (n)                 | (o)                         | (p)           | (q)              | (r)                     | (s)                       |
|----------------------------------------------------|-----------|-------------------|----------------------|---------------|------------------------------|-----------------------------|------------------------------|-----------------------------------|-------------------------------------------|-------------------------------------------|---------------------------------|----------------------------|---------------------|-----------------------------|---------------|------------------|-------------------------|---------------------------|
| Sample                                             | Ethnicity | NCBI Genome Build | Contig Coverage (Mb) | Total Contigs | Discordant Heterozygous SNPs | Attempted Heterozygous SNPs | LFR phased Heterozygous SNPs | Parental phased Heterozygous SNPs | LFR and Parental Phased Heterozygous SNPs | LFR and Parental shared Heterozygous SNPs | Parental only Heterozygous SNPs | LFR only Heterozygous SNPs | Parent phasing rate | Phasable, not phased by LFR | Phasable Hets | LFR phasing rate | Parent+LFR phasing rate | Final Parent phasing rate |
| NA19240-Replicate 1                                | Yoruban   | 36                | 2471.012             | 5184          | 523                          | 2750435                     | 2386741                      | 2063441                           | 2559045                                   | 1861621                                   | 201820                          | 495604                     | 0.81                | 250294                      | 2637035       | 0.91             | 0.97                    | 0.78                      |
| NA19240-Replicate 2                                | Yoruban   | 36                | 2448.412             | 5976          | 571                          | 2764157                     | 2433621                      | 2063930                           | 2592567                                   | 1878517                                   | 185413                          | 528637                     | 0.80                | 232903                      | 2666524       | 0.91             | 0.97                    | 0.77                      |
| NA19240-10 cell pipeline 2.0                       | Yoruban   | 37                | 2429.906             | 6492          | 498                          | 2763449                     | 2369433                      | 2063763                           | 2584299                                   | 1822845                                   | 240918                          | 520536                     | 0.80                | 301684                      | 2671117       | 0.89             | 0.97                    | 0.77                      |
| NA19240-Replicate 1 High Coverage                  | Yoruban   | 37                | 2519.329             | 4653          | 571                          | 2829582                     | 2578903                      | 2066534                           | 2644040                                   | 1974361                                   | 92173                           | 577506                     | 0.78                | 117931                      | 2696834       | 0.96             | 0.98                    | 0.77                      |
| NA19240-Replicates 1&2 combined                    | Yoruban   | 36                | 2536.297             | 4415          | 612                          | 2850047                     | 2646352                      | 2063441                           | 2665715                                   | 2010040                                   | 53401                           | 602274                     | 0.77                | 68988                       | 2715340       | 0.97             | 0.98                    | 0.76                      |
| NA19240-Replicate 1 LFR only pipeline 2.0          | Yoruban   | 36                | 2407.376             | 5655          | 301                          | 2292288                     | 2031514                      | 2063957                           | 2480153                                   | 1597832                                   | 466125                          | 416196                     | 0.83                | 560119                      | 2242288       | 0.91*            | N/A                     | N/A                       |
| NA19240-Replicate 1 High Coverage LFR only         | Yoruban   | 37                | 2475.34              | 4765          | 356                          | 2433547                     | 2274696                      | 2066534                           | 2559719                                   | 1764689                                   | 301845                          | 493185                     | 0.81                | 373881                      | 2383547       | 0.95*            | N/A                     | N/A                       |
| NA19240-Replicate 1 High accuracy parental phasing | Yoruban   | 36                | 2476.683             | 5055          | 50                           | 2805342                     | 2451098                      | 1698566                           | 2545108                                   | 1579454                                   | 119112                          | 846542                     | 0.67                | 178476                      | 2755342       | 0.89             | 0.98                    | 0.62                      |
| NA19240-Replicate 2 High accuracy parental phasing | Yoruban   | 36                | 2422.567             | 5664          | 67                           | 2808022                     | 2454182                      | 1698566                           | 2560182                                   | 1562866                                   | 135700                          | 861616                     | 0.66                | 204535                      | 2758022       | 0.89             | 0.98                    | 0.62                      |
| NA12877-Replicate 1                                | European  | 36                | 1952.645             | 8648          | 680                          | 2046264                     | 1831032                      | 1455700                           | 1906444                                   | 1351382                                   | 104318                          | 450744                     | 0.76                | 136619                      | 1967651       | 0.93             | 0.97                    | 0.74                      |
| NA12877-Replicate 2                                | European  | 36                | 1973.28              | 8565          | 607                          | 2052808                     | 1810540                      | 1455933                           | 1895131                                   | 1340238                                   | 115695                          | 439198                     | 0.77                | 150596                      | 1961136       | 0.92             | 0.97                    | 0.74                      |
| NA12877-Replicates 1&2 combined                    | European  | 36                | 2045.964             | 8163          | 693                          | 2104621                     | 1946089                      | 1455700                           | 1955308                                   | 1412988                                   | 42712                           | 499608                     | 0.74                | 57371                       | 2003460       | 0.97             | 0.98                    | 0.73                      |
| NA12885                                            | European  | 36                | 2045.509             | 8945          | 474                          | 2127176                     | 1850409                      | 1539991                           | 1953981                                   | 1409873                                   | 130118                          | 413990                     | 0.79                | 165097                      | 2015506       | 0.92             | 0.97                    | 0.76                      |
| NA12886                                            | European  | 36                | 1993.077             | 8584          | 482                          | 2082023                     | 1854360                      | 1494882                           | 1929621                                   | 1390698                                   | 104184                          | 434739                     | 0.77                | 134483                      | 1988843       | 0.93             | 0.97                    | 0.75                      |
| NA12891                                            | European  | 36                | 2000.171             | 8075          | N/A                          | 2070884                     | 1825427                      | N/A                               | N/A                                       | N/A                                       | N/A                             | N/A                        | N/A                 | N/A                         | 2020884       | 0.90*            | N/A                     | N/A                       |
| NA12892                                            | European  | 36                | 2094.884             | 8318          | N/A                          | 2121645                     | 1917442                      | N/A                               | N/A                                       | N/A                                       | N/A                             | N/A                        | N/A                 | N/A                         | 2071645       | 0.93*            | N/A                     | N/A                       |
| NA12892 LFR only                                   | European  | 36                | 2044.514             | 8522          | N/A                          | 1825812                     | 1720750                      | N/A                               | N/A                                       | N/A                                       | N/A                             | N/A                        | N/A                 | N/A                         | 1775812       | 0.97*            | N/A                     | N/A                       |
| NA20431 High Coverage                              | European  | 37                | 1929.948             | 9611          | N/A                          | 2085859                     | 1703047                      | N/A                               | N/A                                       | N/A                                       | N/A                             | N/A                        | N/A                 | N/A                         | 2035859       | 0.84*            | N/A                     | N/A                       |

**Supplementary Table 4. Phasing statistics.** This table lists output statistics from the LFR phasing algorithm. For genomes NA12891, NA12892, and NA20431 we do not have parental sequence data. Trio phasing results are unavailable for these genomes. Discordantly phased SNPs (f) are predominately due to errors in parent-based phasing except when high accuracy parental data is used (only 50-67 discordances). The following columns were calculated as (n)=(i)/j, (o)=(l)/(h), (p)=(h)+(o), (q)=(h)/(p), (r)=(j)/(p), and (s)=(i)/(p). \*Phasing rate was calculated by dividing the number of LFR phased SNPs by the number of attempted SNPs-50,000 estimated errors, this is used where parents aren't available or in LFR only libraries were less SNPs are detected.

| Sample  | Ethnicity              | # of Clear RLHs | Mb in Clear RLHs | % of Genome Clear | % of Chr. X Clear | Expected % of Chr. X Clear | % Increase in Chr. X vs. Genome |
|---------|------------------------|-----------------|------------------|-------------------|-------------------|----------------------------|---------------------------------|
| NA19025 | Luhya, Kenya           | 4,490           | 369.2            | 13.6              |                   |                            |                                 |
| NA19703 | African in USA         | 4,678           | 369.0            | 13.6              |                   |                            |                                 |
| NA19240 | Yoruba, Nigeria        | 5,068           | 413.2            | 14.5              | 17.3              | 19.3                       | 20                              |
| NA21737 | Maasai, Kenya          | 5,149           | 394.7            | 14.6              |                   |                            |                                 |
| MP1*    | German                 | 9,267           | 809.3            | 29.9              |                   |                            |                                 |
| NA20431 | European               | 9,878           | 833.2            | 30.8              |                   |                            |                                 |
| NA12877 | European               | 9,008           | 837.3            | 30.9              |                   |                            |                                 |
| NA12885 | European               | 9,907           | 896.0            | 31.4              | 51.0              | 41.8                       | 63                              |
| NA12892 | European               | 9,534           | 897.0            | 31.4              | 49.0              | 41.8                       | 56                              |
| NA20847 | Gujarati Indian in USA | 9,094           | 900.6            | 31.5              | 48.4              | 42.0                       | 54                              |
| NA18555 | Han Chinese            | 9,922           | 1065.1           | 39.3              |                   |                            |                                 |

**Supplementary Table 5. Regions of Low Heterozygosity (RLHs) in Diverse Genomes.**

RLHs are genomic regions of greater than or equal to 30kb with less than or equal to 1.4 hets per 10kb. Clear RLHs exclude RLHs comprising reference sequence with undetermined bases. The percent of genome and chromosome X calculation is based on the fully sequenced portions of build 36 of the NCBI genome, 2.86 Gb and 151 Mb respectively. For male samples, the sequenced portion of the X chromosome was subtracted from the total genome size (2.71 Gb) because males are haploid for the X chromosome. \*Not sequenced by Complete Genomics.

| Heterozygous<br>SNPs/Mb (Adjusted) | NA19025   |            | NA19703   |            | NA19240   |            | NA12877   |            | NA20431   |            | NA18555   |            |
|------------------------------------|-----------|------------|-----------|------------|-----------|------------|-----------|------------|-----------|------------|-----------|------------|
|                                    | # of RLHs | % of Total |
| 0-10                               | 52        | 14%        | 42        | 11%        | 74        | 17%        | 49        | 5%         | 43        | 4%         | 40        | 3%         |
| 11-30                              | 60        | 17%        | 68        | 18%        | 81        | 19%        | 165       | 18%        | 205       | 18%        | 337       | 23%        |
| 31-50                              | 74        | 21%        | 70        | 19%        | 76        | 18%        | 320       | 35%        | 420       | 37%        | 555       | 37%        |
| 51-70                              | 83        | 23%        | 89        | 24%        | 89        | 21%        | 219       | 24%        | 259       | 23%        | 344       | 23%        |
| 71-90                              | 55        | 15%        | 65        | 17%        | 75        | 17%        | 112       | 12%        | 155       | 14%        | 150       | 10%        |
| 91-130                             | 35        | 10%        | 44        | 12%        | 36        | 8%         | 53        | 6%         | 48        | 4%         | 56        | 4%         |
| Total                              | 359       | 100%       | 378       | 100%       | 431       | 100%       | 918       | 100%       | 1130      | 100%       | 1482      | 100%       |

**Supplementary Table 6. Distribution of RLHs greater than 200kb by density of heterozygous SNPs.** For all samples analyzed 90-95% of RLHs are shorter than 200kb in length. RLHs are defined as genomic regions of greater than or equal to 30kb with less than or equal to 1.4 hets per 10kb. To compensate for "edge" effects and errors, four heterozygous SNPs are removed from the count.

|          | NA19240   |            | NA20431   |            |
|----------|-----------|------------|-----------|------------|
|          | # of RLHs | % of Total | # of RLHs | % of Total |
| All RLHs | 5069      | 100        | 9008      | 100        |
| 30-100kb | 4059      | 80.1       | 6612      | 73.4       |
| >100 kb  | 1010      | 19.9       | 2396      | 26.6       |
| >300 kb  | 146       | 3.6        | 324       | 4.9        |
| >1000 kb | 5         | 0.5        | 9         | 0.4        |

**Supplementary Table 7. Size distribution of RLHs.**

RLHs are defined as genomic regions of 30 kb with less than 1.4 heterozygous SNPs per 10kb. European genomes have more RLHs due to the out of Africa bottleneck (Supplementary Table 6) but similar length distribution.

| PartA                                                                                 | NA12877              | NA19240              |
|---------------------------------------------------------------------------------------|----------------------|----------------------|
| Comparable heterozygous SNPs                                                          | 1726638              | 2209986              |
| Fraction of total phased heterozygous SNPs                                            | 95%                  | 93%                  |
| Estimated discordant individual heterozygous SNPs per library in contig without flips | 96                   | 64                   |
| Discordance rate(%)                                                                   | 0.0056               | 0.0029               |
| Discordance frequency                                                                 | 1 in 17,986 het SNPs | 1 in 34,531 het SNPs |
| Phasing error rate (diploid genome length: 2700Mb male and 2850Mb female)             | 1 in 28Mb            | 1 in 44Mb            |
| Part B                                                                                |                      |                      |
| All 2+ HETs contigs                                                                   | 8620                 | 6132                 |
| Estimated contigs with flips per library                                              | 116                  | 135                  |
| % contigs affected                                                                    | 1.35                 | 2.20                 |

**Supplementary Table 8. Haplotype discordance between replicate LFR libraries.** Two replicate libraries from samples NA12877 and NA19240 were compared at all shared phased heterozygous SNP loci. This is a comprehensive comparison because most of phased loci are shared between the two libraries.



| Chr.       | NA12877 Replicate 1 |            |              | NA12877 Replicate 2 |            |              |
|------------|---------------------|------------|--------------|---------------------|------------|--------------|
|            | Shared phased SNPs  | Discordant | % Discordant | Shared phased SNPs  | Discordant | % Discordant |
| 1          | 121047              | 6          | 0.00496      | 121706              | 8          | 0.00657      |
| 2          | 121255              | 1          | 0.00082      | 122056              | 1          | 0.00082      |
| 3          | 108892              | 3          | 0.00276      | 109815              | 5          | 0.00455      |
| 4          | 117360              | 3          | 0.00256      | 119134              | 3          | 0.00252      |
| 5          | 99796               | 3          | 0.00301      | 100801              | 0          | 0.00000      |
| 6          | 105194              | 4          | 0.00380      | 105695              | 5          | 0.00473      |
| 7          | 63016               | 7          | 0.01111      | 63866               | 11         | 0.01722      |
| 8          | 90852               | 0          | 0.00000      | 91338               | 3          | 0.00328      |
| 9          | 69480               | 2          | 0.00288      | 69921               | 6          | 0.00858      |
| 10         | 81618               | 5          | 0.00613      | 82340               | 7          | 0.00850      |
| 11         | 57598               | 12         | 0.02083      | 58067               | 6          | 0.01033      |
| 12         | 79176               | 3          | 0.00379      | 79998               | 4          | 0.00500      |
| 13         | 54107               | 1          | 0.00185      | 54603               | 2          | 0.00366      |
| 14         | 49354               | 0          | 0.00000      | 49511               | 5          | 0.01010      |
| 15         | 46996               | 10         | 0.02128      | 47366               | 23         | 0.04856      |
| 16         | 43564               | 8          | 0.01836      | 44072               | 18         | 0.04084      |
| 17         | 44564               | 0          | 0.00000      | 44975               | 4          | 0.00889      |
| 18         | 45319               | 0          | 0.00000      | 45456               | 2          | 0.00440      |
| 19         | 28491               | 3          | 0.01053      | 29007               | 3          | 0.01034      |
| 20         | 33636               | 0          | 0.00000      | 34035               | 4          | 0.01175      |
| 21         | 17421               | 1          | 0.00574      | 17531               | 1          | 0.00570      |
| 22         | 21218               | 1          | 0.00471      | 21335               | 2          | 0.00937      |
| total      | 1499954             | 73         | 0.00487      | 1512628             | 123        | 0.00813      |
| total all* | 1499954             | 256        | 0.01707      | 1512628             | 398        | 0.02631      |

**Supplementary Table 9. Comparison of LFR contigs to Roach et al.**

**contigs.** LFR contigs were compared to those generated by Roach et al.<sup>2</sup>. Since ISB used the parental data only for validation, and not in phasing, while comparing ISB results with ours, some contigs are expected not to match in parental designation. If not accounted for, this apparent discrepancy can inflate the true discordance measure. In order to have a more realistic estimation of the discordances, only the contigs that were confirmed to align in parental designation were used. This was achieved by discounting the contigs that did not align in parental designation, as measured by having greater than 85% discordance.

| Chr. | Position  | Reference | Variant | Replicate 1 |     | Replicate 2 |     | Replicates 1 and 2 |     | Result                                  | RLH |
|------|-----------|-----------|---------|-------------|-----|-------------|-----|--------------------|-----|-----------------------------------------|-----|
|      |           |           |         | mom         | dad | mom         | dad | mom                | dad |                                         |     |
| 1    | 181262791 | C         | A       | A           | C   | A           | C   | A                  | C   | Phased                                  | No  |
| 1    | 213849510 | A         | T       | A           | T   | A           | T   | A                  | T   | Phased                                  | No  |
| 1    | 243613456 | A         | G       | G           | A   | G           | A   | G                  | A   | Phased                                  | No  |
| 2    | 25946767  | G         | A       | -           | -   | -           | -   | -                  | -   | Not phased                              | Yes |
| 2    | 151377073 | A         | G       | G           | A   | G           | A   | G                  | A   | Phased                                  | No  |
| 3    | 11793938  | T         | C       | -           | -   | T           | C   | T                  | C   | Phased                                  | No  |
| 3    | 72300288  | G         | A       | A           | G   | A           | G   | A                  | G   | Phased                                  | No  |
| 3    | 118683826 | C         | T       | C           | T   | C           | T   | C                  | T   | Phased                                  | No  |
| 4    | 41027699  | T         | C       | T           | C   | T           | C   | T                  | C   | Phased                                  | No  |
| 5    | 3882079   | T         | G       | G           | T   | G           | T   | G                  | T   | Phased                                  | No  |
| 5    | 74064809  | C         | T       | T           | C   | T           | C   | T                  | C   | Phased                                  | No  |
| 5    | 160180969 | G         | A       | G           | A   | G           | A   | G                  | A   | Phased                                  | No  |
| 6    | 20526350  | C         | T       | T           | C   | -           | -   | T                  | C   | Phased                                  | No  |
| 6    | 75923343  | G         | A       | G           | A   | G           | A   | G                  | A   | Phased                                  | No  |
| 7    | 125546271 | C         | G       | G           | C   | G           | C   | G                  | C   | Phased                                  | No  |
| 7    | 125547785 | C         | G       | G           | C   | G           | C   | G                  | C   | Phased                                  | No  |
| 8    | 3720596   | C         | A       | A           | C   | -           | -   | A                  | C   | Phased                                  | No  |
| 8    | 76910527  | G         | A       | A           | G   | -           | -   | A                  | G   | Phased                                  | No  |
| 8    | 140579460 | C         | T       | C           | T   | C           | T   | C                  | T   | Phased                                  | No  |
| 9    | 78623566  | G         | A       | G           | A   | G           | A   | G                  | A   | Phased                                  | No  |
| 9    | 98146694  | T         | A       | -           | -   | -           | -   | -                  | -   | Not called in standard or LFR libraries | N/A |
| 9    | 102781329 | T         | C       | T           | C   | T           | C   | T                  | C   | Phased                                  | No  |
| 10   | 133424322 | A         | G       | -           | -   | A           | G   | A                  | G   | Phased                                  | No  |
| 11   | 24444780  | G         | A       | G           | A   | G           | A   | G                  | A   | Phased                                  | No  |
| 11   | 25362086  | G         | A       | A           | G   | A           | G   | A                  | G   | Phased                                  | No  |
| 11   | 125708187 | G         | A       | A           | G   | A           | G   | A                  | G   | Phased                                  | No  |
| 11   | 130878775 | C         | T       | T           | C   | T           | C   | T                  | C   | Phased                                  | No  |
| 12   | 59046995  | G         | A       | A           | G   | A           | G   | A                  | G   | Phased                                  | No  |
| 13   | 33576317  | C         | T       | -           | -   | -           | -   | -                  | -   | Not phased                              | Yes |
| 13   | 40031189  | C         | T       | C           | T   | C           | T   | C                  | T   | Phased                                  | No  |
| 13   | 97628143  | C         | T       | C           | T   | C           | T   | C                  | T   | Phased                                  | No  |
| 14   | 53878165  | G         | T       | G           | T   | G           | T   | G                  | T   | Phased                                  | No  |
| 16   | 45177203  | T         | C       | -           | -   | T           | C   | T                  | C   | Phased                                  | Yes |
| 17   | 1623091   | G         | A       | G           | A   | G           | A   | G                  | A   | Phased                                  | No  |
| 17   | 56613332  | C         | T       | T           | C   | T           | C   | T                  | C   | Phased                                  | No  |

**Supplementary Table 10. Conrad *et al.* de-novo mutation phasing.** 35 de novo mutations in NA19240 identified by Conrad *et al.*<sup>32</sup> were phased by at least one replicate or the combined replicates for NA19240 LFR libraries. All coordinates are in NCBI build 36.

|                                        | NA12877                                         |                                                 |                           |                           | NA19240                                         |                                                 |                           |                           |
|----------------------------------------|-------------------------------------------------|-------------------------------------------------|---------------------------|---------------------------|-------------------------------------------------|-------------------------------------------------|---------------------------|---------------------------|
|                                        | Standard library<br>SNPs/Replicate 1<br>phasing | Standard library<br>SNPs/Replicate 2<br>phasing | Replicate 1<br>(3+ wells) | Replicate 2<br>(3+ wells) | Standard library<br>SNPs/Replicate 1<br>phasing | Standard library<br>SNPs/Replicate 2<br>phasing | Replicate 1<br>(3+ wells) | Replicate 2<br>(3+ wells) |
| <i>de-novo</i> -like heterozygous SNPs | 3,813                                           | 3,813                                           | 26,494                    | 32,931                    | 3,633                                           | 3,633                                           | 50,137                    | 38,859                    |
| Phased by LFR1 and LFR2                | 1,589                                           | 1,589                                           | 1,297                     | 1,447                     | 1,057                                           | 1,057                                           | 998                       | 1,127                     |
| Error-like                             | 2,224                                           | 2,224                                           | 25,197                    | 31,484                    | 2,576                                           | 2,576                                           | 49,139                    | 37,732                    |
| Error-like-phased                      | 243                                             | 286                                             | 433                       | 463                       | 282                                             | 227                                             | 556                       | 854                       |
| Error reduction factor                 | 9x                                              | 8x                                              | 58x                       | 68x                       | 9x                                              | 11x                                             | 88x                       | 44x                       |
| Avoided errors                         | 1,981                                           | 1,938                                           | 24,764                    | 31,021                    | 2,294                                           | 2,349                                           | 48,583                    | 36,878                    |

**Supplementary Table 11. LFR enabled error reduction.** Standard library heterozygous SNP calls alone and in combination with LFR calls were phased independently by replicate LFR libraries. In general LFR introduced approximately 10 fold more false positive variant calls. This most likely occurred as a result of the stochastic incorporation of incorrect bases during phi29 based multiple displacement amplification. Importantly, if heterozygous SNP calls are required to be phased and found in 3 or more independent wells the error reduction is dramatic and better than the standard library without error correction. LFR can remove errors from the standard library as well; improving call accuracy by approximately 10 fold.

| Gene Symbol | Chr. | Position  | Span (bp) | Gene region or TFBS | TFBS max score | TFBS Orientation | P1 variant | P1 TFBS score | P2 variant | P2 TFBS score | Ref | P1 % frequency | P2 % frequency |
|-------------|------|-----------|-----------|---------------------|----------------|------------------|------------|---------------|------------|---------------|-----|----------------|----------------|
| PDE4DIP     | 1    | 144918957 | 16358     | CDS                 |                |                  | A          |               | T          |               | T   | 86             | 14             |
|             |      | 144930594 |           | CDS                 |                |                  | A          |               | C          |               | C   | 85             | 15             |
|             |      | 144934080 |           | <i>AP1</i>          | 10.7           | +                | T          | 6.7           | A          | 10.7          | A   |                |                |
|             |      | 144934761 |           | <i>Nkx2-5</i>       | 9.4            | -                | G          | 5.1           | T          | 9.4           | T   |                |                |
|             |      | 144934860 |           | <i>Gata1</i>        | 14.5           | -                | T          | 12.0          | C          | 4.0           | C   |                |                |
|             |      | 144935315 |           | <i>NKx3-1</i>       | 11.5           | -                | G          | 11.5          | A          | 8.2           | A   |                |                |
| DNAJC10     | 2    | 183578218 | 64913     | <i>TLX1::NFIC</i>   | 20.4           | -                | C          | 7.1           | T          | 11.2          | C   |                |                |
|             |      | 183580882 |           | <i>RREB1</i>        | 24.4           | +                | G          | 12.0          | A          | 9.5           | A   |                |                |
|             |      | 183593697 |           | CDS                 |                |                  | T          |               | C          |               | C   | 43             | 56             |
|             |      | 183642878 |           | UTR3                |                |                  | A          |               | G          |               | G   | 34             | 64             |
|             |      | 183643131 |           | UTR3                |                |                  | T          |               | C          |               | C   | 35             | 64             |
| EDEM1       | 3    | 5226415   | 32570     | <i>Foxa2</i>        | 17.4           | +                | T          | 13.4          | A          | 6.9           | A   |                |                |
|             |      | 5258078   |           | UTR3                |                |                  | A          |               | G          |               | G   | 74             | 26             |
|             |      | 5258431   |           | UTR3                |                |                  | A          |               | G          |               | G   | 74             | 26             |
|             |      | 5258985   |           | UTR3                |                |                  | C          |               | T          |               | T   | 59             | 39             |
| VPS13A      | 9    | 79792920  | 193137    | <i>PPARG::RXRA</i>  | 20.3           | +                | T          | 8.5           | G          | 11.4          | G   |                |                |
|             |      | 79792920  |           | <i>STAT1</i>        | 19.6           | -                | T          | 10.6          | G          | 6.5           | G   |                |                |
|             |      | 79986057  |           | CDS                 |                |                  | G          |               | A          |               | A   | 31             | 69             |
| ALDH1L2     | 12   | 105415948 | 66390     | UTR3                |                |                  | G          |               | A          |               | A   | 9              | 91             |
|             |      | 105417406 |           | UTR3                |                |                  | T          |               | C          |               | C   | 4              | 96             |
|             |      | 105479562 |           | <i>Lhx3</i>         | 18.0           |                  | A          | 13.4          | G          | 9.5           | G   |                |                |
|             |      | 105482184 |           | <i>En1</i>          | 9.4            |                  | G          | 8.0           | T          | 4.7           | T   |                |                |
|             |      | 105482338 |           | <i>NFKB1</i>        | 16.6           |                  | G          | 6.5           | C          | 10.7          | C   |                |                |
| UBE2G2      | 21   | 46189094  | 36302     | UTR3                |                |                  | C          |               | T          |               | C   | 33             | 66             |
|             |      | 46191270  |           | UTR3                |                |                  | T          |               | C          |               | C   | 35             | 65             |
|             |      | 46221494  |           | <i>PLAG1</i>        | 21.2           | +                | C          | 9.7           | G          | 13.8          | G   |                |                |
|             |      | 46225396  |           | <i>HNF1A</i>        | 19.0           | -                | T          | 13.1          | C          | 11.4          | C   |                |                |

**Supplementary Figure 12. Genes with allelic expression differences and TFBS altering SNPs in NA20431.** Out of a nonexhaustive list of genes that demonstrated significant allelic differences in expression, 6 genes were found with SNPs that altered TFBSs and correlated with the differences in expression seen between alleles. All position are given in reference to NCBI build 37. CDS stands for coding sequence and UTR3 for 3' untranslated region.

| Sample            | Ethnicity | Number of 10kb regions with >0.33% divergence (>1.5 M years) | % genome | Number of 10kb regions with >0.4% divergence (>2.0 M years) | % genome | Number of 10kb regions with >0.48% divergence (>2.5 M years) | % genome | Number of 10kb regions with >0.63% divergence (>3.5 M years) | % genome |
|-------------------|-----------|--------------------------------------------------------------|----------|-------------------------------------------------------------|----------|--------------------------------------------------------------|----------|--------------------------------------------------------------|----------|
| NA19240           | Yoruban   | 5020                                                         | 1.76     | 2634                                                        | 0.92     | 1279                                                         | 0.45     | 400                                                          | 0.14     |
| NA12877           | European  | 3967                                                         | 1.47     | 2167                                                        | 0.80     | 1086                                                         | 0.40     | 391                                                          | 0.14     |
| NA12892           | European  | 3714                                                         | 1.30     | 1957                                                        | 0.69     | 964                                                          | 0.34     | 317                                                          | 0.11     |
| African adjusted  | Yoruban   |                                                              | 2.05     |                                                             | 1.07     |                                                              | 0.52     |                                                              | 0.16     |
| European adjusted | European  |                                                              | 2.13     |                                                             | 1.16     |                                                              | 0.58     |                                                              | 0.21     |

**Supplementary Table 13. Highly diverged segments in the human genomes.** Highly diverged regions were identified by comparing haplotypes within each individual genome. The two Europeans used in this table are unrelated, yet have a very similar number of phased variants. Time of divergence is based upon 0.15% divergence per 1 million years (Myr) and a standing variation of 0.1%. This rate of 0.15% per Myr is based upon an approximation of 1% human versus chimp divergence over a 6 Myr time of independent evolution since a common ancestor. Adjusted percentages reflect that 14% of African and 31% of European genomes are in RLHs, and indicate that the divergent regions were present before the exit of humans from Africa.
